# Supplementary material
Source: PubMed Central journal article supplement (PMC6314496)
Supplement: NIHMS976353-supplement-1.pdf [file NIHMS976353-supplement-1.pdf]

# Estimating the evolution of disease in the Parkinson's Progression Markers Initiative

Samuel Iddi<sup>a,b</sup>, Dan Li<sup>a</sup>, Paul S. Aisen<sup>a</sup>, Michael S. Rafii<sup>a</sup>, Irene Litvan<sup>d</sup>, Wesley  
K. Thompson<sup>c</sup>, & Michael C. Donohue<sup>a\*</sup>

<sup>a</sup>Alzheimer's Therapeutic Research Institute, University of Southern California,  
San Diego, USA

<sup>b</sup>Department of Statistics, University of Ghana, Legon-Accra, Ghana

<sup>c</sup>Department of Neurosciences, University of California, San Diego, USA

<sup>d</sup>Department of Family Medicine and Public Health, University of California, San  
Diego, USA

\*Correspondence: [mdonohue@usc.edu](mailto:mdonohue@usc.edu)

## Supplementary Appendix

[ FIGUREA1.JPEG HERE]

Figure A.1: Distribution of estimate of time shift,  $\hat{\delta}_t$  by disease status.

**Abbreviations:** PD, Parkinson Disease; HC, Healthy Control.

[ FIGUREA2.JPEG HERE]

**Figure A.2:** Correlation between random slopes for pair of outcomes.

**Abbreviations:** PIGD, Posture Instability and Gait Difficulty; RBD, REM sleep behavior disorder; UPSIT, University of Pennsylvania Smell Identification Test; MOCA, Montreal Cognitive Assessment; HVL, Hopkins Verbal Learning Test; GDS, Geriatric Depression Scale; SFT, Semantic Fluency Test; SCOPA, Scale for Outcomes in Parkinson's; LINEORT, Line Orientation Test; UPDRS, Unified Parkinson Disease Rating Scale; STAI, State Trait Anxiety Index; PD, Parkinson Disease; HC, Healthy Control.

[ FIGUREA3A.JPEG and FIGUREA3B.JPEG HERE]

(a) For 17 outcomes (b) For 9 outcomes with UPDRS separated

**Figure A.3:** Population level predicted severity for female with mean age and median latent time of a healthy control. The legend is ordered by the age at which the predicted severity level for each outcome is 0.5 (sliced horizontally).

**Abbreviations:** PIGD, Posture Instability and Gait Difficulty; RBD, REM sleep behavior disorder; UPSIT, University of Pennsylvania Smell Identification Test; MOCA, Montreal Cognitive Assessment; HVL, Hopkins Verbal Learning Test; GDS, Geriatric Depression Scale; SFT, Semantic Fluency Test; SCOPA, Scale for Outcomes in Parkinson's; LINEORT, Line Orientation Test; UPDRS, Unified Parkinson Disease Rating Scale; STAI, State Trait Anxiety Index; PD, Parkinson Disease; HC, Healthy Control.

[ FIGUREA4A.JPEG AND FIGUREA4B.JPEG HERE]

(a) Female.

(b) Male.

**Figure A.4:** Positional variance diagram of the central ordering. The x-axis is the event position.

**Abbreviations:** PIGD, Posture Instability and Gait Difficulty; RBD, REM sleep behavior disorder;

UPSIT, University of Pennsylvania Smell Identification Test; MOCA, Montreal Cognitive Assessment; HVL, Hopkins Verbal Learning Test; GDS, Geriatric Depression Scale; SFT, Semantic Fluency Test; SCOPA, Scale for Outcomes in Parkinson's; LINEORT, Line Orientation Test; UPDRS, Unified Parkinson Disease Rating Scale; STAI, State Trait Anxiety Index; PD, Parkinson Disease; HC, Healthy Control.

[ FIGUREA5.JPEG HERE]

**Figure A.5:** Positional variance diagram of the central ordering

**Abbreviations:** PIGD, Posture Instability and Gait Difficulty; RBD, REM sleep behavior disorder; UPSIT, University of Pennsylvania Smell Identification Test; MOCA, Montreal Cognitive Assessment; HVL, Hopkins Verbal Learning Test; GDS, Geriatric Depression Scale; SFT, Semantic Fluency Test; SCOPA, Scale for Outcomes in Parkinson's; LINEORT, Line Orientation Test; UPDRS, Unified Parkinson Disease Rating Scale; STAI, State Trait Anxiety Index; PD, Parkinson Disease; HC, Healthy Control.

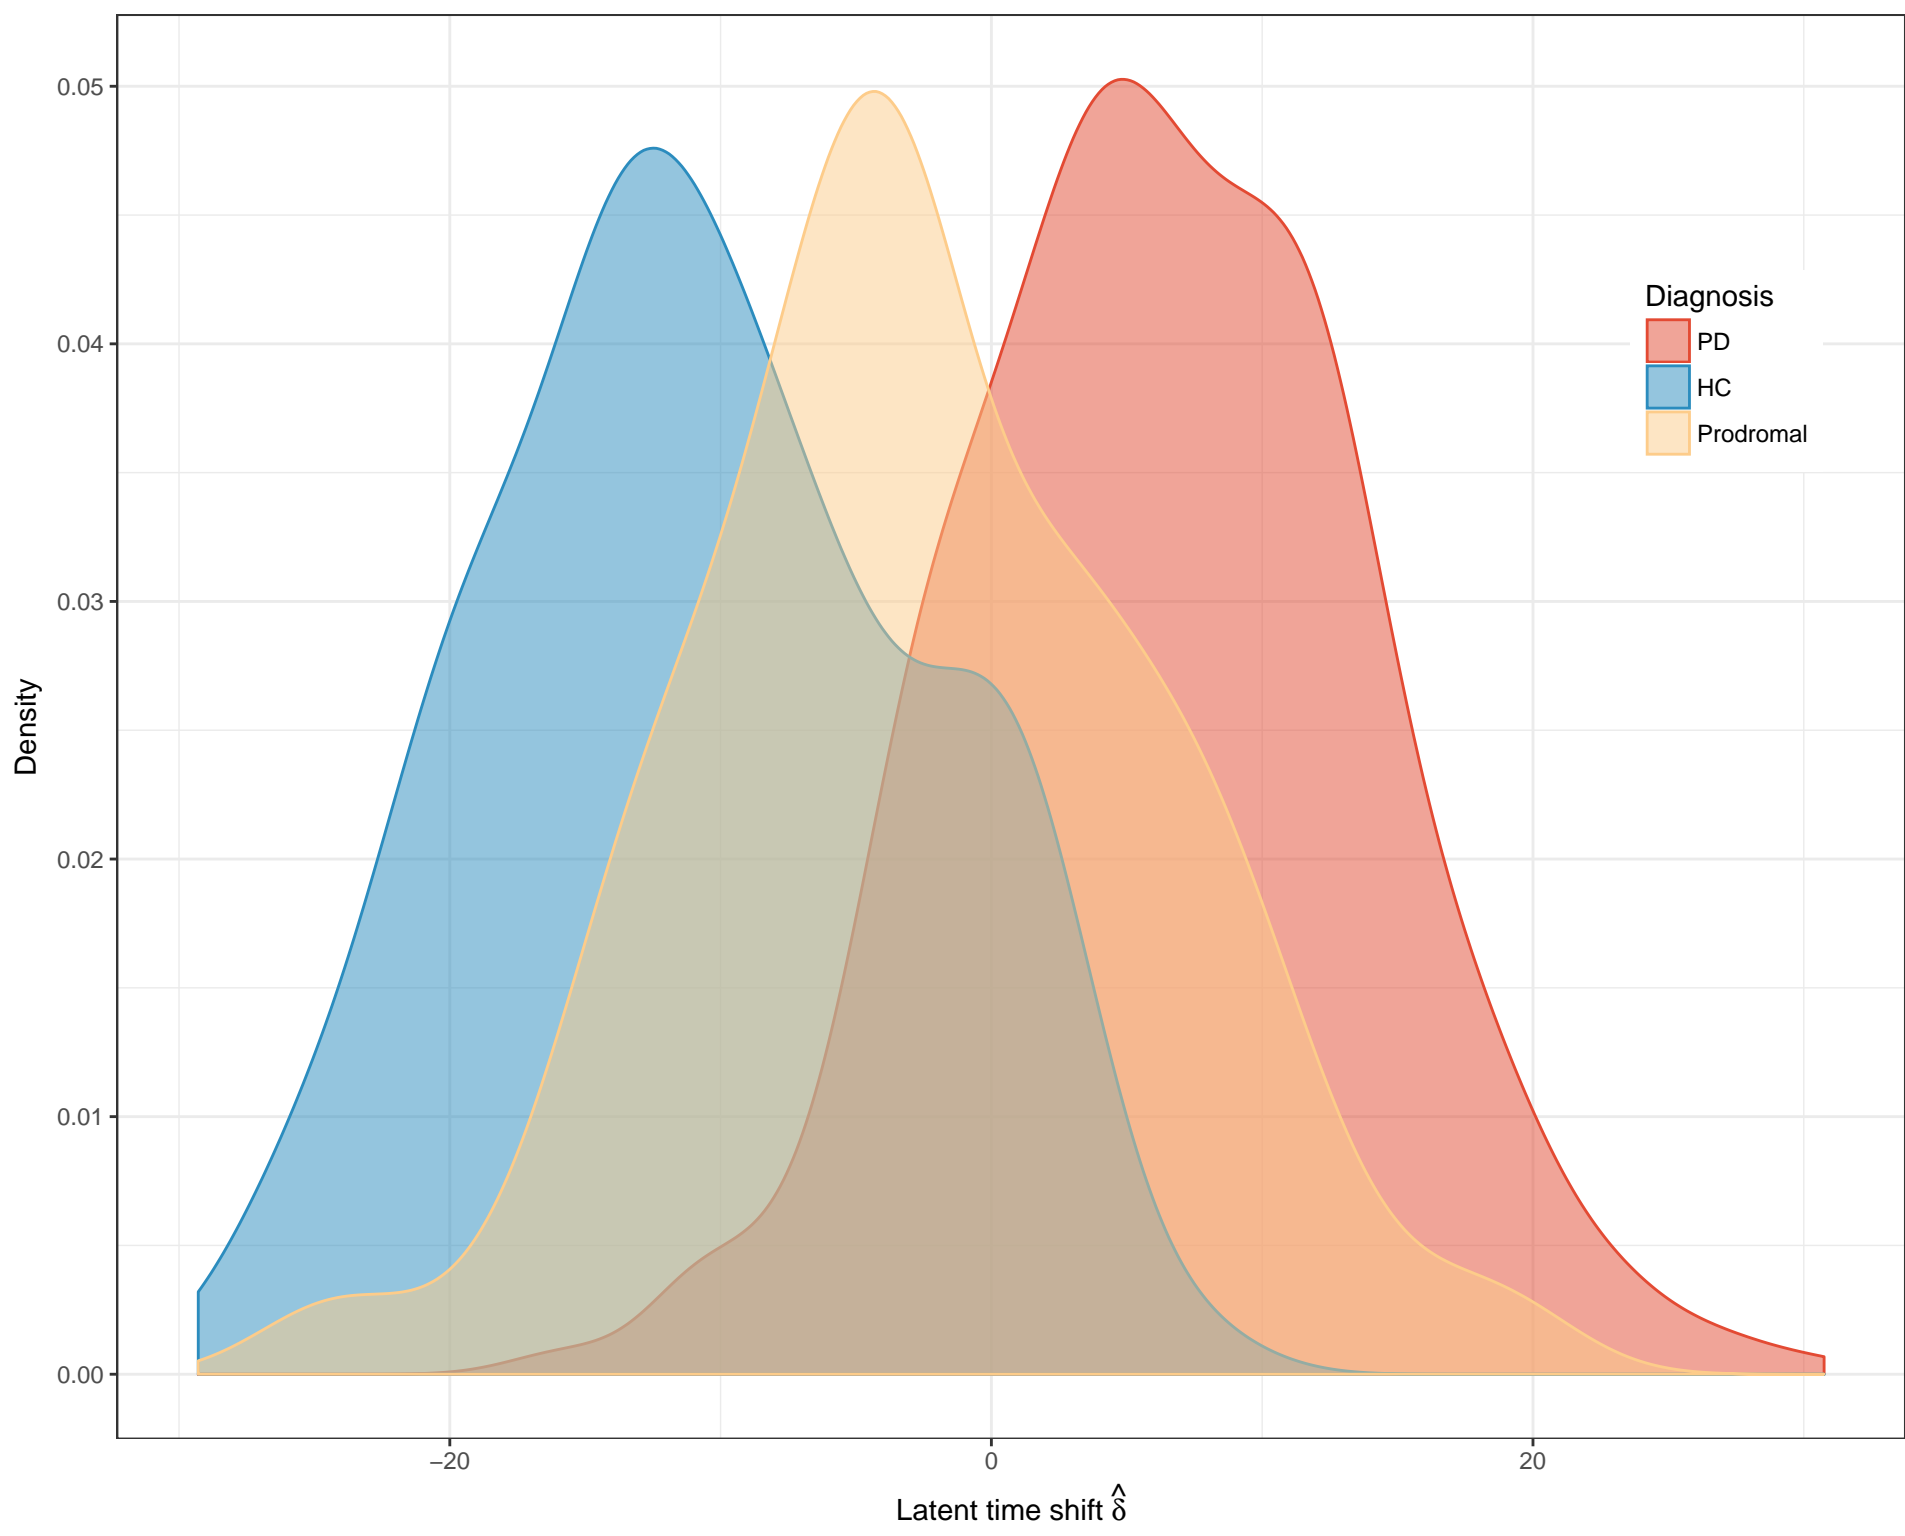

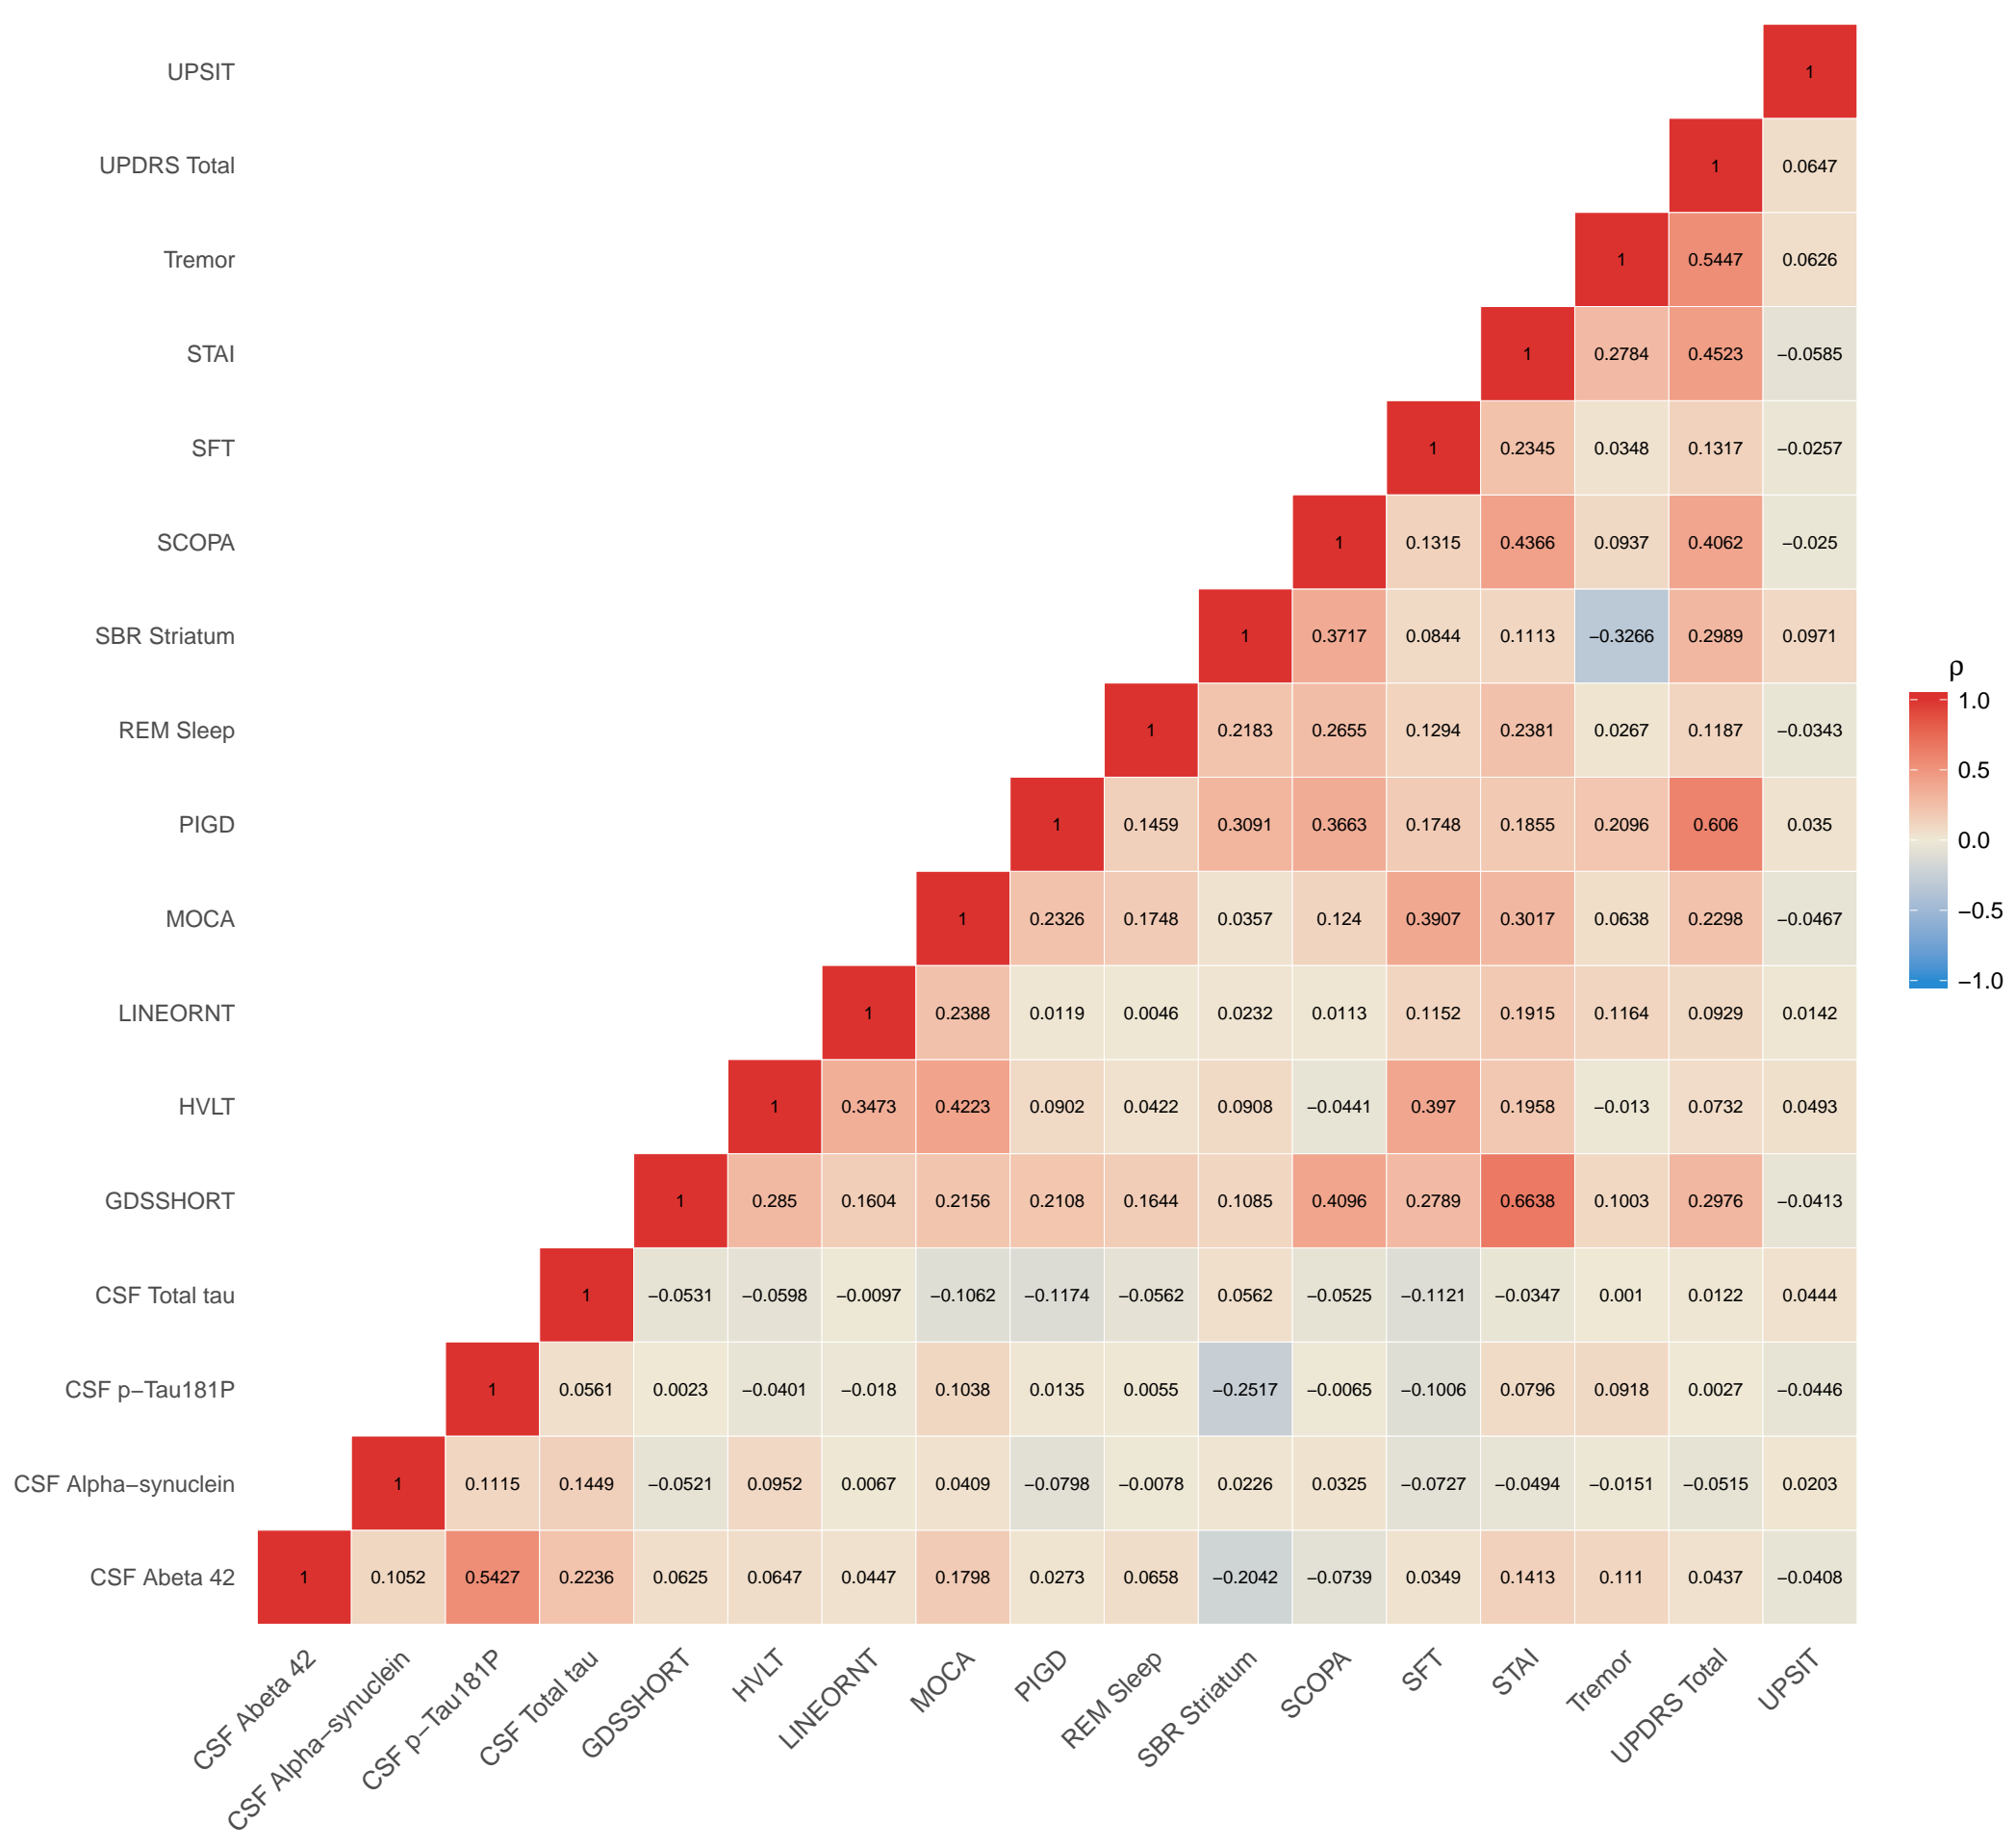

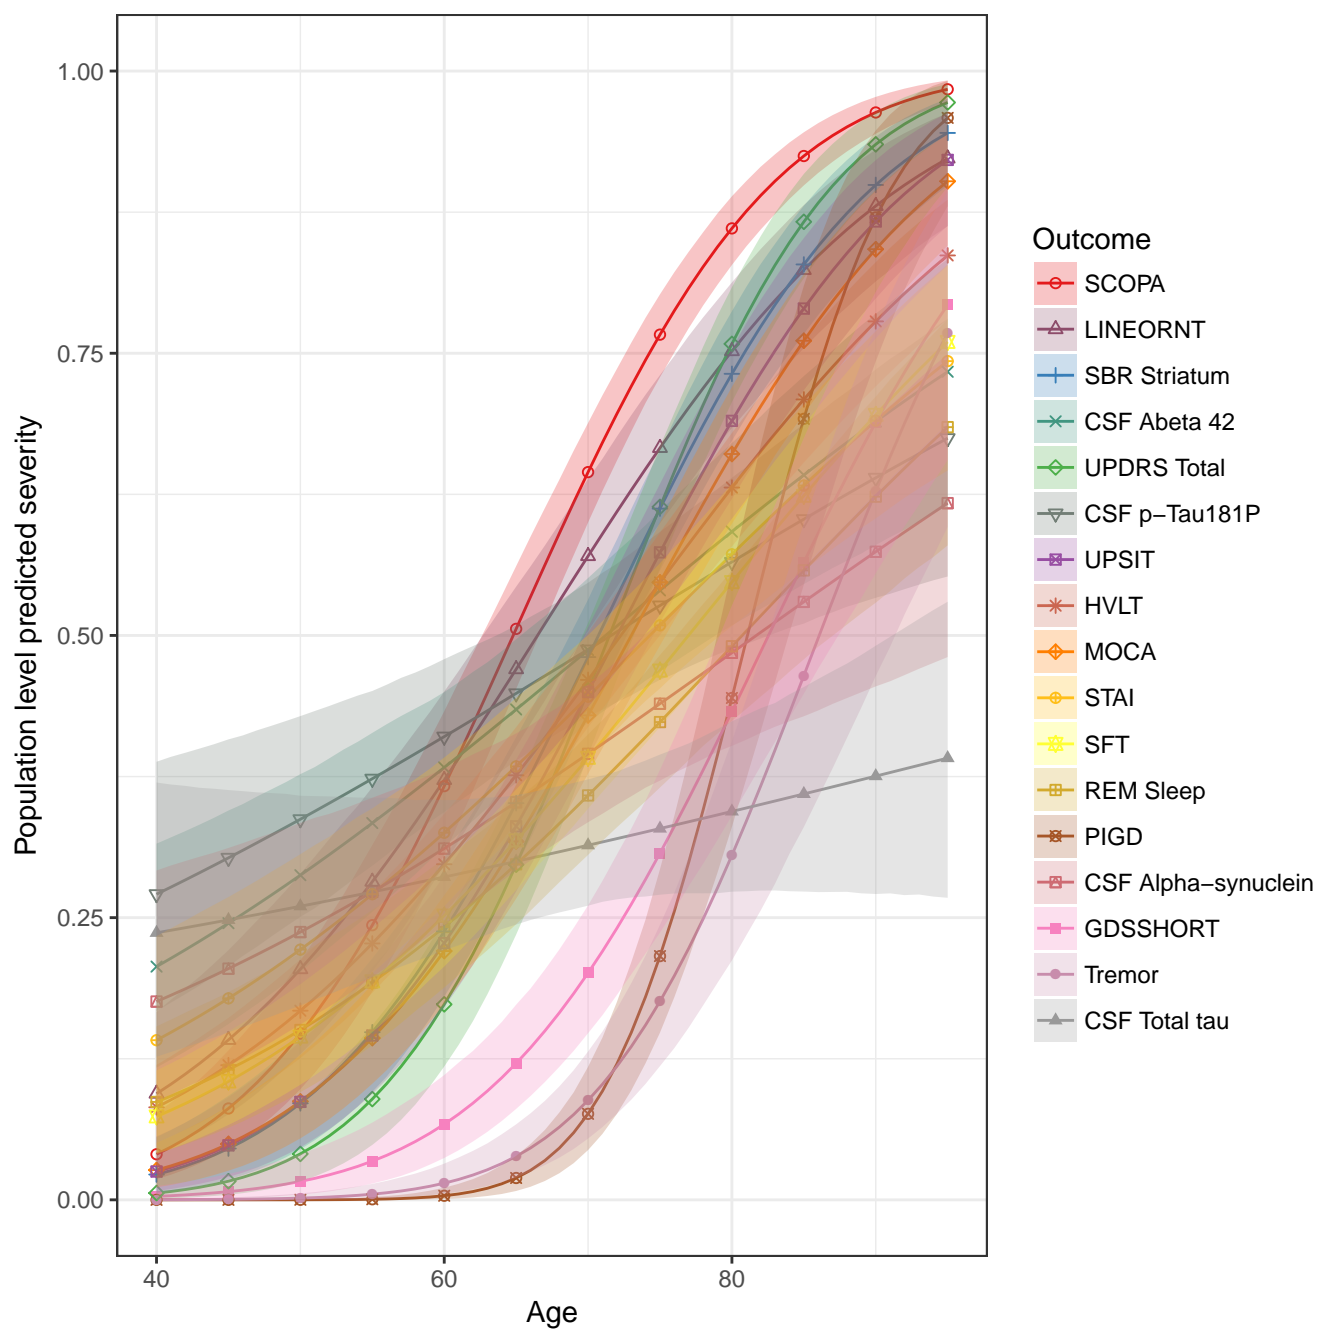

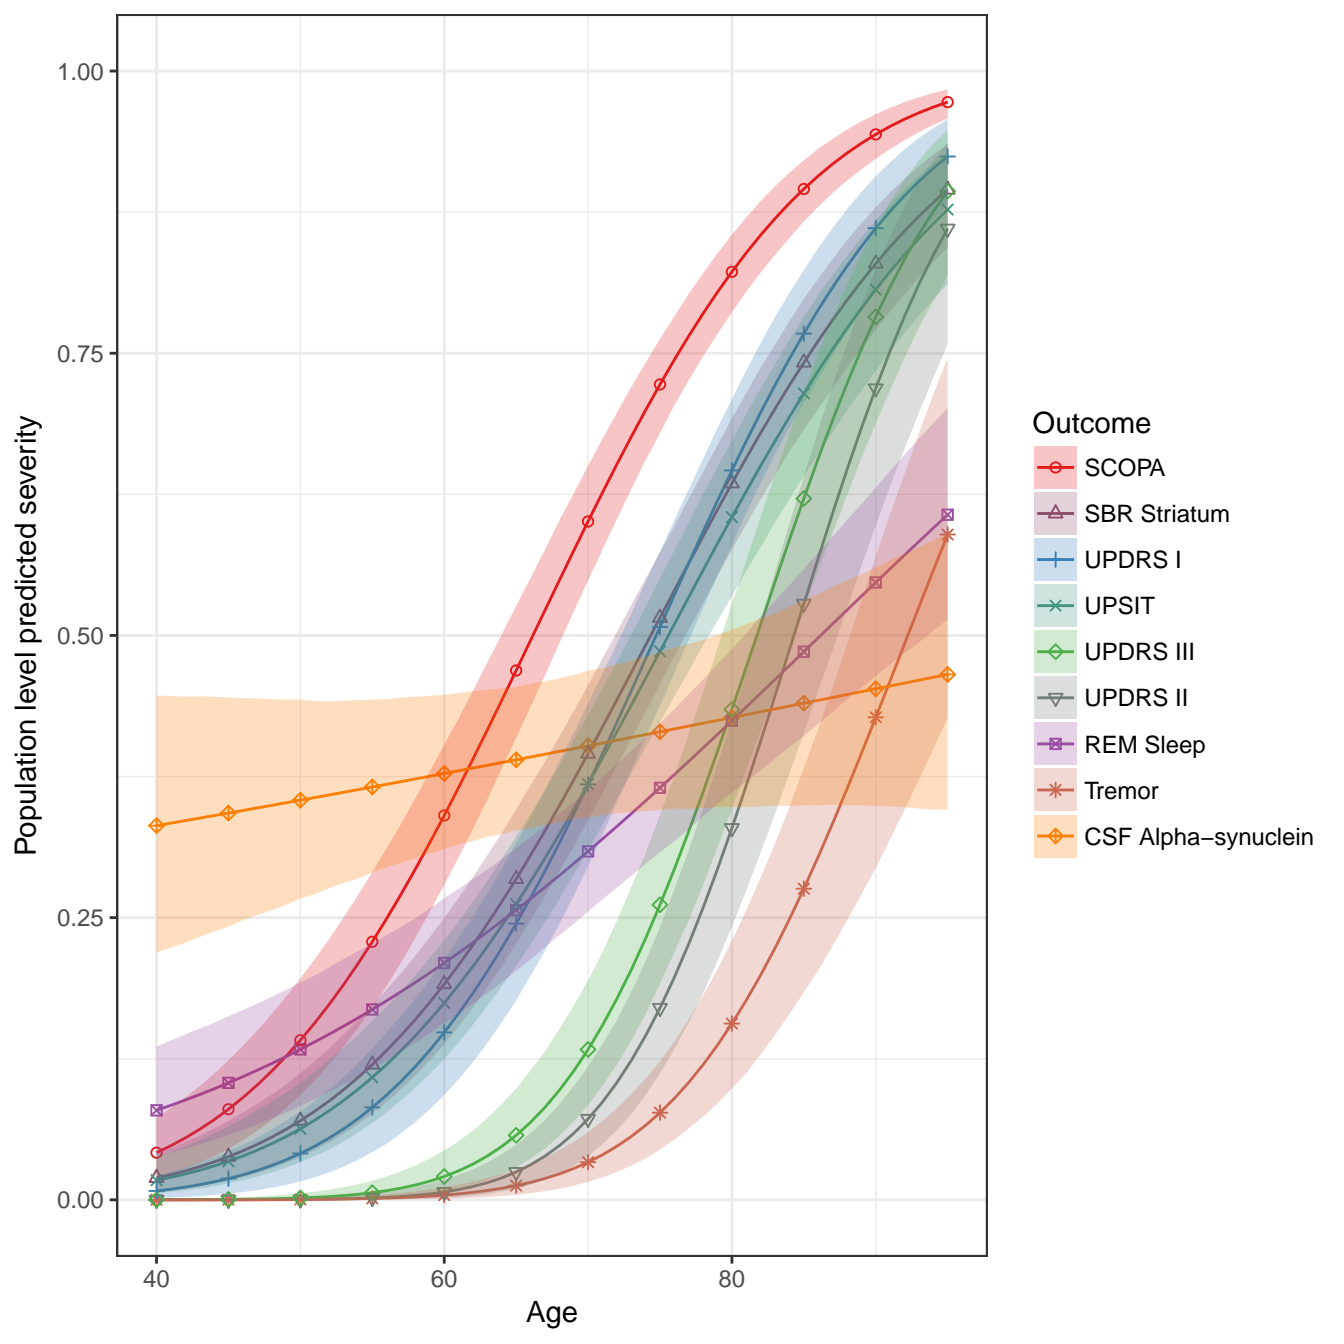









Table A. 1: Results of posterior estimates of parameters and corresponding 95% credible interval for all 17 outcomes from the Parkinson's Progression Markers Initiative (PPMI).

| Parameter                  | Post. Mean | 95% Credible    | Parameter                     | Post. Mean | 95% Credible    | Parameter                        | Post. Mean | 95% Credible    |
|----------------------------|------------|-----------------|-------------------------------|------------|-----------------|----------------------------------|------------|-----------------|
| <b>CSF Abeta 42</b>        |            |                 | <b>MOCA</b>                   |            |                 | <b>Tremor</b>                    |            |                 |
| Intercept                  | -0.099     | (-0.586,0.405)  | Intercept                     | -1.871     | (-2.304,-1.431) | Intercept                        | -0.203     | (-0.975,0.572)  |
| Age                        | 0.003      | (-0.005,0.011)  | Age                           | 0.030      | (0.023,0.036)   | Age                              | -0.009     | (-0.021,0.002)  |
| Female                     | -0.073     | (-0.234,0.076)  | Female                        | -0.284     | (-0.427,-0.148) | Female                           | -0.176     | (-0.419,0.065)  |
| Latent time, $\gamma_1$    | 0.023      | (0.015,0.032)   | Latent time, $\gamma_8$       | 0.945      | (0.917,0.974)   | Latent time, $\gamma_{15}$       | 0.094      | (0.071,0.114)   |
| Error Variance, $\sigma_1$ | 0.416      | (0.387,0.448)   | Error Variance, $\sigma_8$    | 0.945      | (0.917,0.974)   | Error Variance, $\sigma_{15}$    | 0.811      | (0.796,0.827)   |
| <b>CSF Alpha-synuclein</b> |            |                 | <b>PIGD</b>                   |            |                 | <b>UPDRS Total</b>               |            |                 |
| Intercept                  | 0.813      | (0.342,1.274)   | Intercept                     | -2.250     | (-3.054,-1.4)   | Intercept                        | -0.524     | (-0.985,-0.06)  |
| Age                        | -0.012     | (-0.019,-0.004) | Age                           | 0.016      | (0.003,0.028)   | Age                              | 0.010      | (0.003,0.017)   |
| Female                     | -0.151     | (-0.309,0.007)  | Female                        | 0.076      | (-0.164,0.328)  | Female                           | -0.047     | (-0.188,0.098)  |
| Latent time, $\gamma_2$    | 0.034      | (0.024,0.045)   | Latent time, $\gamma_9$       | 0.114      | (0.085,0.139)   | Latent time, $\gamma_{16}$       | 0.073      | (0.054,0.088)   |
| Error Variance, $\sigma_2$ | 0.424      | (0.394,0.454)   | Error Variance, $\sigma_9$    | 1.156      | (1.134,1.178)   | Error Variance, $\sigma_{16}$    | 0.349      | (0.343,0.356)   |
| <b>CSF p-Tau181P</b>       |            |                 | <b>REM Sleep</b>              |            |                 | <b>UPSIT</b>                     |            |                 |
| Intercept                  | 0.352      | (-0.109,0.81)   | Intercept                     | 0.317      | (-0.121,0.745)  | Intercept                        | -1.103     | (-1.567,-0.642) |
| Age                        | -0.005     | (-0.013,0.002)  | Age                           | -0.006     | (-0.013,0.001)  | Age                              | 0.019      | (0.012,0.026)   |
| Female                     | 0.084      | (-0.065,0.23)   | Female                        | -0.115     | (-0.256,0.027)  | Female                           | -0.210     | (-0.352,-0.067) |
| Latent time, $\gamma_3$    | 0.025      | (0.017,0.033)   | Latent time, $\gamma_{10}$    | 0.040      | (0.03,0.05)     | Latent time, $\gamma_{17}$       | 0.043      | (0.032,0.055)   |
| Error Variance, $\sigma_3$ | 0.717      | (0.667,0.766)   | Error Variance, $\sigma_{10}$ | 0.584      | (0.568,0.6)     | Error Variance, $\sigma_{17}$    | 0.218      | (0.059,0.446)   |
| <b>CSF Total tau</b>       |            |                 | <b>SBR Striatum</b>           |            |                 | <b>Heterogeneous parameters</b>  |            |                 |
| Intercept                  | 1.773      | (1.318,2.252)   | Intercept                     | -1.079     | (-1.476,-0.681) | Intercept, $\tau_0$              | 5.002      | (4.19,5.831)    |
| Age                        | -0.027     | (-0.035,-0.02)  | Age                           | 0.018      | (0.012,0.025)   | Age, $\tau_1$                    | -0.001     | (-0.012,0.009)  |
| Female                     | -0.223     | (-0.374,-0.063) | Female                        | -0.084     | (-0.211,0.043)  | Female, $\tau_2$                 | -0.063     | (-0.287,0.159)  |
| Latent time, $\gamma_4$    | 0.036      | (0.025,0.046)   | Latent time, $\gamma_{11}$    | 0.049      | (0.035,0.061)   |                                  |            |                 |
| Error Variance, $\sigma_4$ | 0.275      | (0.255,0.295)   | Error Variance, $\sigma_{11}$ | 0.212      | (0.2,0.224)     |                                  |            |                 |
| <b>GDSHORT</b>             |            |                 | <b>SCOPA</b>                  |            |                 | <b>Model comparison criteria</b> |            |                 |
| Intercept                  | -0.388     | (-1.044,0.287)  | Intercept                     | -2.319     | (-2.685,-1.933) | WAIC                             | 117860.0   |                 |
| Age                        | -0.002     | (-0.012,0.008)  | Age                           | 0.033      | (0.027,0.039)   | LOOIC                            | 120166.7   |                 |
| Female                     | -0.097     | (-0.302,0.115)  | Female                        | 0.504      | (0.388,0.618)   |                                  |            |                 |
| Latent time, $\gamma_5$    | 0.069      | (0.051,0.084)   | Latent time, $\gamma_{12}$    | 0.038      | (0.029,0.047)   |                                  |            |                 |
| Error Variance, $\sigma_5$ | 1.116      | (1.088,1.147)   | Error Variance, $\sigma_{12}$ | 0.469      | (0.456,0.482)   |                                  |            |                 |
| <b>HVLT</b>                |            |                 | <b>SFT</b>                    |            |                 |                                  |            |                 |
| Intercept                  | -1.157     | (-1.488,-0.813) | Intercept                     | -0.905     | (-1.286,-0.536) |                                  |            |                 |
| Age                        | 0.021      | (0.016,0.026)   | Age                           | 0.017      | (0.011,0.023)   |                                  |            |                 |
| Female                     | -0.335     | (-0.446,-0.224) | Female                        | -0.492     | (-0.616,-0.368) |                                  |            |                 |
| Latent time, $\gamma_6$    | 0.022      | (0.017,0.029)   | Latent time, $\gamma_{13}$    | 0.022      | (0.016,0.029)   |                                  |            |                 |
| Error Variance, $\sigma_6$ | 0.551      | (0.534,0.568)   | Error Variance, $\sigma_{13}$ | 0.429      | (0.417,0.443)   |                                  |            |                 |
| <b>LINEORNT</b>            |            |                 | <b>STAI</b>                   |            |                 |                                  |            |                 |
| Intercept                  | -2.041     | (-2.609,-1.493) | Intercept                     | 0.701      | (0.26,1.139)    |                                  |            |                 |
| Age                        | 0.022      | (0.014,0.03)    | Age                           | -0.012     | (-0.018,-0.005) |                                  |            |                 |
| Female                     | 0.763      | (0.592,0.932)   | Female                        | 0.136      | (0.002,0.274)   |                                  |            |                 |
| Latent time, $\gamma_7$    | 0.028      | (0.019,0.038)   | Latent time, $\gamma_{14}$    | 0.044      | (0.033,0.054)   |                                  |            |                 |
| Error Variance, $\sigma_7$ | 1.185      | (1.152,1.22)    | Error Variance, $\sigma_{14}$ | 0.594      | (0.578,0.61)    |                                  |            |                 |
